# Supplementary material for: Screening of Fungal Strains and Formulations of Metarhizium anisopliae to Control Phyllotreta striolata in Chinese Flowering Cabbage
Source: MDPI journal article supplement (doi:10.3390/insects14060567), 2023-06-19
Supplement: s1 [file s1]

## Supplementary Materials

**Table S1.** Bioactivity of different fungal strains against *Phyllotreta striolata*.

| Fungi species                 | Number    | Corrected Mortality (%) |              |              |
|-------------------------------|-----------|-------------------------|--------------|--------------|
|                               |           | 7 d                     | 9 d          | 11 d         |
| <i>Beauveria bassiana</i>     | BbGX22A02 | 6.67 ± 0.09             | 6.67 ± 0.09  | 6.67 ± 0.09  |
|                               | BbGX6502  | 0.00 ± 0.00             | 0.00 ± 0.00  | 0.00 ± 0.00  |
|                               | BbGX7303  | 6.67 ± 0.09             | 6.67 ± 0.09  | 40.00 ± 0.28 |
|                               | BbGX10A01 | 10.00 ± 0.08            | 13.33 ± 0.05 | 26.67 ± 0.09 |
|                               | BbGX7703  | 6.67 ± 0.09             | 20.00 ± 0.28 | 20.00 ± 0.28 |
|                               | BbGX77A01 | 13.33 ± 0.09            | 13.33 ± 0.09 | 40.00 ± 0.16 |
| <i>B. brongniartii</i>        | BbGX70A02 | 0.00 ± 0.00             | 0.00 ± 0.00  | 0.00 ± 0.00  |
| <i>Cordyceps fumosorosea</i>  | IfGX20A02 | 0.00 ± 0.00             | 6.67 ± 0.09  | 6.67 ± 0.09  |
|                               | IfGX21G01 | 0.00 ± 0.00             | 0.00 ± 0.00  | 0.00 ± 0.00  |
|                               | IfGX2802  | 0.00 ± 0.00             | 6.67 ± 0.09  | 6.67 ± 0.09  |
|                               | IfGX21L01 | 13.33 ± 0.09            | 13.33 ± 0.09 | 13.33 ± 0.09 |
|                               | IfGX33H05 | 0.00 ± 0.00             | 26.67 ± 0.25 | 26.67 ± 0.25 |
|                               | IfGX30S01 | 6.67 ± 0.09             | 6.67 ± 0.09  | 20.00 ± 0.16 |
|                               | IfGX30A01 | 0.00 ± 0.00             | 13.33 ± 0.19 | 20.00 ± 0.16 |
|                               | IfGX70A01 | 13.33 ± 0.09            | 13.33 ± 0.09 | 13.33 ± 0.09 |
|                               | IfGX7704  | 6.67 ± 0.05             | 13.33 ± 0.05 | 16.67 ± 0.05 |
|                               | IfGZ4304  | 6.67 ± 0.09             | 6.67 ± 0.09  | 13.33 ± 0.09 |
| <i>C. farinosa</i>            | IfGX2303  | 13.33 ± 0.19            | 13.33 ± 0.19 | 13.33 ± 0.19 |
|                               | IfGX6701  | 0.00 ± 0.00             | 0.00 ± 0.00  | 0.00 ± 0.00  |
|                               | IcGX32S01 | 0.00 ± 0.00             | 26.67 ± 0.09 | 26.67 ± 0.09 |
|                               | MaYN8304  | 20.00 ± 0.04            | 30.00 ± 0.08 | 38.33 ± 0.13 |
| <i>Metarhizium anisopliae</i> | MaGX33H02 | 6.67 ± 0.09             | 6.67 ± 0.09  | 6.67 ± 0.09  |
|                               | MaGX7002  | 0.00 ± 0.00             | 6.67 ± 0.09  | 6.67 ± 0.09  |
|                               | MaGX23A01 | 0.00 ± 0.00             | 0.00 ± 0.00  | 6.67 ± 0.09  |

|                                  |           |              |              |              |
|----------------------------------|-----------|--------------|--------------|--------------|
|                                  | MaGX19S02 | 46.67 ± 0.09 | 46.67 ± 0.09 | 53.33 ± 0.09 |
|                                  | MaGX13S01 | 0.00 ± 0.00  | 0.00 ± 0.00  | 6.67 ± 0.09  |
|                                  | MaGX19J01 | 0.00 ± 0.00  | 6.67 ± 0.09  | 6.67 ± 0.09  |
|                                  | MaGX0601  | 0.00 ± 0.00  | 20.00 ± 0.28 | 20.00 ± 0.28 |
|                                  | MaGX7201  | 13.33 ± 0.09 | 20.00 ± 0.16 | 20.00 ± 0.16 |
|                                  | MaGX02A02 | 0.00 ± 0.00  | 0.00 ± 0.00  | 3.33 ± 0.05  |
|                                  | MaGX09A02 | 3.33 ± 0.05  | 10.00 ± 0.08 | 20.00 ± 0.16 |
|                                  | MaYN8304  | 20.00 ± 0.09 | 30.00 ± 0.09 | 38.33 ± 0.09 |
|                                  | MaGX7702  | 6.67 ± 0.09  | 20.00 ± 0.00 | 20.00 ± 0.00 |
| <i>M. guizhouense</i>            | MgGX1103  | 0.00 ± 0.00  | 13.33 ± 0.09 | 23.33 ± 0.17 |
| <i>M. flavoviride</i>            | MfGX6501  | 6.67 ± 0.09  | 6.67 ± 0.09  | 13.33 ± 0.09 |
|                                  | MfGX33Y01 | 0.00 ± 0.00  | 0.00 ± 0.00  | 6.67 ± 0.09  |
| <i>Pochonia</i>                  | P.GX0801  | 6.67 ± 0.09  | 16.67 ± 0.13 | 26.67 ± 0.21 |
| <i>P.chlamydosporia</i>          | PcGX13Z02 | 0.00 ± 0.00  | 6.67 ± 0.09  | 6.67 ± 0.09  |
|                                  | PcGX2301  | 13.33 ± 0.09 | 13.33 ± 0.09 | 13.33 ± 0.09 |
|                                  | PcGX33Y03 | 0.00 ± 0.00  | 0.00 ± 0.00  | 0.00 ± 0.00  |
|                                  | PcGX08A01 | 10.00 ± 0.00 | 13.33 ± 0.05 | 20.00 ± 0.08 |
| <i>P. bulbillosa</i>             | PbGX13S04 | 0.00 ± 0.00  | 13.33 ± 0.12 | 13.33 ± 0.12 |
|                                  | PbGX32S02 | 0.00 ± 0.00  | 6.67 ± 0.09  | 6.67 ± 0.09  |
|                                  | PbGX16S04 | 0.00 ± 0.00  | 13.33 ± 0.19 | 13.33 ± 0.19 |
| <i>Purpureocillium lilacinum</i> | PIYN6601  | 0.00 ± 0.00  | 6.67 ± 0.09  | 6.67 ± 0.09  |
|                                  | PIGX7402  | 0.00 ± 0.00  | 0.00 ± 0.00  | 0.00 ± 0.00  |
|                                  | PIGX7706  | 6.67 ± 0.09  | 13.33 ± 0.09 | 13.33 ± 0.09 |
|                                  | PIGX1001  | 6.67 ± 0.09  | 6.67 ± 0.09  | 6.67 ± 0.09  |
|                                  | PIGX77A04 | 6.67 ± 0.09  | 6.67 ± 0.09  | 6.67 ± 0.09  |
|                                  | PIGX0802  | 3.33 ± 0.05  | 6.67 ± 0.05  | 13.33 ± 0.09 |
|                                  | PIGX06A01 | 6.67 ± 0.05  | 10.00 ± 0.05 | 13.33 ± 0.05 |
|                                  | PIGX7202  | 0.00 ± 0.00  | 0.00 ± 0.00  | 0.00 ± 0.00  |

|                                |           |              |              |              |
|--------------------------------|-----------|--------------|--------------|--------------|
|                                | PIGX6802  | 0.00 ± 0.00  | 0.00 ± 0.00  | 6.67 ± 0.09  |
|                                | PIGX70A03 | 0.00 ± 0.00  | 0.00 ± 0.00  | 0.00 ± 0.00  |
|                                | PIGX17A01 | 0.00 ± 0.00  | 0.00 ± 0.00  | 0.00 ± 0.00  |
|                                | PIYN0401  | 6.67 ± 0.09  | 13.33 ± 0.09 | 23.33 ± 0.17 |
|                                | PIYN0203  | 15.00 ± 0.15 | 20.00 ± 0.19 | 28.33 ± 0.27 |
|                                | PIGX16S03 | 6.67 ± 0.09  | 20.00 ± 0.16 | 3.33 ± 0.25  |
|                                | PIGX1702  | 20.00 ± 0.16 | 20.00 ± 0.16 | 20.00 ± 0.16 |
|                                | PIGX6901  | 0.00 ± 0.00  | 0.00 ± 0.00  | 0.00 ± 0.00  |
|                                | PIGX7101  | 13.33 ± 0.09 | 13.33 ± 0.09 | 13.33 ± 0.09 |
|                                | PIGX7003  | 26.67 ± 0.25 | 26.67 ± 0.25 | 26.67 ± 0.25 |
|                                | PIGX04A01 | 6.67 ± 0.05  | 10.00 ± 0.08 | 16.67 ± 0.09 |
|                                | PIGX0501  | 0.00 ± 0.00  | 3.33 ± 0.05  | 6.67 ± 0.09  |
|                                | PIGX0401  | 6.67 ± 0.05  | 13.33 ± 0.05 | 23.33 ± 0.05 |
|                                | PIGX0201  | 20.00 ± 0.28 | 20.00 ± 0.28 | 26.67 ± 0.25 |
|                                | PIGX19S01 | 0.00 ± 0.00  | 0.00 ± 0.00  | 0.00 ± 0.00  |
|                                | PIYN6701  | 6.67 ± 0.09  | 33.33 ± 0.09 | 40.00 ± 0.28 |
|                                | PIGX7302  | 0.00 ± 0.00  | 0.00 ± 0.00  | 0.00 ± 0.00  |
|                                | PIYN5901  | 6.67 ± 0.09  | 6.67 ± 0.09  | 13.33 ± 0.09 |
|                                | PIGZ5801  | 0.00 ± 0.00  | 13.33 ± 0.19 | 26.67 ± 0.25 |
|                                | PIYN8102  | 20.00 ± 0.28 | 33.33 ± 0.34 | 33.33 ± 0.34 |
|                                | PIYN8002  | 6.67 ± 0.09  | 20.00 ± 0.16 | 20.00 ± 0.16 |
|                                | PIYN8202  | 26.67 ± 0.09 | 26.67 ± 0.09 | 33.33 ± 0.09 |
| <i>P. lavendulum</i>           | PIGZ4402  | 0.00 ± 0.00  | 0.00 ± 0.00  | 0.00 ± 0.00  |
|                                | PIGX6801  | 5.00 ± 0.00  | 18.33 ± 0.05 | 30.00 ± 0.07 |
|                                | PIGX6503  | 0.00 ± 0.00  | 0.00 ± 0.00  | 6.67 ± 0.09  |
| <i>Paecilomyces marquandii</i> | PmGX7701  | 0.00 ± 0.00  | 0.00 ± 0.00  | 0.00 ± 0.00  |
|                                | PmGX12Y01 | 0.00 ± 0.00  | 0.00 ± 0.00  | 6.67 ± 0.09  |
|                                | PmGX7001  | 0.00 ± 0.00  | 0.00 ± 0.00  | 6.67 ± 0.09  |

|                                |           |              |              |              |
|--------------------------------|-----------|--------------|--------------|--------------|
|                                | PmGX24G02 | 0.00 ± 0.00  | 0.00 ± 0.00  | 0.00 ± 0.00  |
|                                | PmGX33H03 | 6.67 ± 0.09  | 20.00 ± 0.16 | 20.00 ± 0.16 |
|                                | PmYN8303  | 6.67 ± 0.09  | 6.67 ± 0.09  | 20.00 ± 0.28 |
|                                | PmGX7301  | 0.00 ± 0.00  | 0.00 ± 0.00  | 6.67 ± 0.09  |
|                                | PmGX6506  | 0.00 ± 0.00  | 0.00 ± 0.00  | 0.00 ± 0.00  |
| <i>Paecilomyces</i>            | P.YN0202  | 5.00 ± 0.00  | 6.67 ± 0.02  | 6.67 ± 0.02  |
|                                | P.GX77A03 | 6.67 ± 0.09  | 13.33 ± 0.19 | 13.33 ± 0.19 |
|                                | P.GX78A01 | 0.00 ± 0.00  | 6.67 ± 0.09  | 13.33 ± 0.09 |
| <i>P. carneus</i>              | PcYN8101  | 13.33 ± 0.09 | 13.33 ± 0.09 | 13.33 ± 0.09 |
|                                | PcYN7801  | 6.67 ± 0.09  | 13.33 ± 0.09 | 20.00 ± 0.00 |
|                                | PcYN8001  | 6.67 ± 0.09  | 13.33 ± 0.09 | 13.33 ± 0.09 |
| <i>Paecilomyces</i>            | P.GX6505  | 0.00 ± 0.00  | 6.67 ± 0.09  | 6.67 ± 0.09  |
| <i>P. citrinum</i>             | PcGX1605  | 6.67 ± 0.09  | 20.00 ± 0.16 | 20.00 ± 0.16 |
|                                | PcGX21L02 | 6.67 ± 0.09  | 13.33 ± 0.09 | 13.33 ± 0.09 |
|                                | PcGX78A02 | 0.00 ± 0.00  | 6.67 ± 0.09  | 6.67 ± 0.09  |
| <i>Acremonium</i>              | A.YN0403  | 11.67 ± 0.08 | 33.33 ± 0.05 | 46.67 ± 0.06 |
| <i>Doratomyces</i>             | D.GX11G02 | 3.33 ± 0.05  | 3.33 ± 0.05  | 3.33 ± 0.05  |
| <i>Lecanicillium</i>           | L.GZ5601  | 0.00 ± 0.00  | 0.00 ± 0.00  | 0.00 ± 0.00  |
| <i>Mortierella</i>             | M.GX13S05 | 0.00 ± 0.00  | 13.33 ± 0.09 | 20.00 ± 0.00 |
| <i>Nectria</i>                 | N.GX2905  | 8.33 ± 0.08  | 16.67 ± 0.10 | 23.33 ± 0.14 |
| <i>Scopulariopsis brumptii</i> | SbGX7705  | 10.00 ± 0.00 | 20.00 ± 0.08 | 30.00 ± 0.14 |
| <i>Talaromyces</i>             | T.GX3101  | 0.00 ± 0.00  | 13.33 ± 0.12 | 13.33 ± 0.12 |
|                                | T.GX05A01 | 0.00 ± 0.00  | 0.00 ± 0.00  | 6.67 ± 0.05  |

The fungal strain concentration:  $1 \times 10^7$  spores/mL. The mortality data were mean ± SE. The numbers of insects for test were 10 in each treatment. The experiment was repeated three times.
